# Supplementary material for: Osteoblast Cell Response to Naturally Derived Calcium Phosphate-Based Materials
Source: PubMed Central journal article supplement (PMC6073128; doi:10.3390/ma11071097), 2018-06-27
Supplement: materials-11-01097-s001.pdf [file materials-11-01097-s001.pdf]

Supplementary Material

# Osteoblast cell response to naturally derived calcium phosphate-based materials

Valentina Mitran <sup>1</sup>, Raluca Ion <sup>1</sup>, Florin Miculescu <sup>2, \*</sup>, Madalina Georgiana Necula <sup>1</sup>, Aura-Catalina Mocanu <sup>2,3</sup>, George Stan <sup>4</sup>, Iulian Antoniac <sup>2</sup>, Anisoara Cimpean <sup>1,\*</sup>

<sup>1</sup> University of Bucharest, Department of Biochemistry and Molecular Biology, 91-95 Spl. Independentei, 050095 Bucharest, Romania; [valentinamitran@yahoo.com](mailto:valentinamitran@yahoo.com) (V.M.); [rciubar@yahoo.com](mailto:rciubar@yahoo.com) (R.I.); [necula.madalina92@gmail.com](mailto:necula.madalina92@gmail.com) (M.G.N.); [anisoara.cimpean@bio.unibuc.ro](mailto:anisoara.cimpean@bio.unibuc.ro) (A.C.)

<sup>2</sup> University Politehnica of Bucharest, Department of Metallic Materials Science, Physical Metallurgy, 313 Splaiul Independentei, 060042, J Building, District 6, Bucharest, Romania; [f\\_miculescu@yahoo.com](mailto:f_miculescu@yahoo.com) (F.M.); [mcn\\_aura@hotmail.com](mailto:mcn_aura@hotmail.com) (A.C.M.); [antoniac.iulian@gmail.com](mailto:antoniac.iulian@gmail.com) (I.A.)

<sup>3</sup> S.C. Nuclear NDT Research & Services S.R.L, Department of Research, Development and Innovation, 104 Berceni Str., Central Laboratory Building, District 4, Bucharest, Romania; [aura.mocanu@nuclearndt.ro](mailto:aura.mocanu@nuclearndt.ro) (A.C.M.)

<sup>4</sup> National Institute of Materials Physics, Laboratory of Multifunctional Materials and Structures, Atomistilor Str., No. 405A PO Box MG 7, 077125, Măgurele-Bucharest, Romania; [george\\_stan1@yahoo.com](mailto:george_stan1@yahoo.com) (G.S.)

\* Correspondence: [anisoara.cimpean@bio.unibuc.ro](mailto:anisoara.cimpean@bio.unibuc.ro); Tel.: +40-21-3181575/106; [f\\_miculescu@yahoo.com](mailto:f_miculescu@yahoo.com); Tel.: +40-21-3169563

Received: 6 June 2018; Accepted: 25 June 2018; Published: 27 June 2018

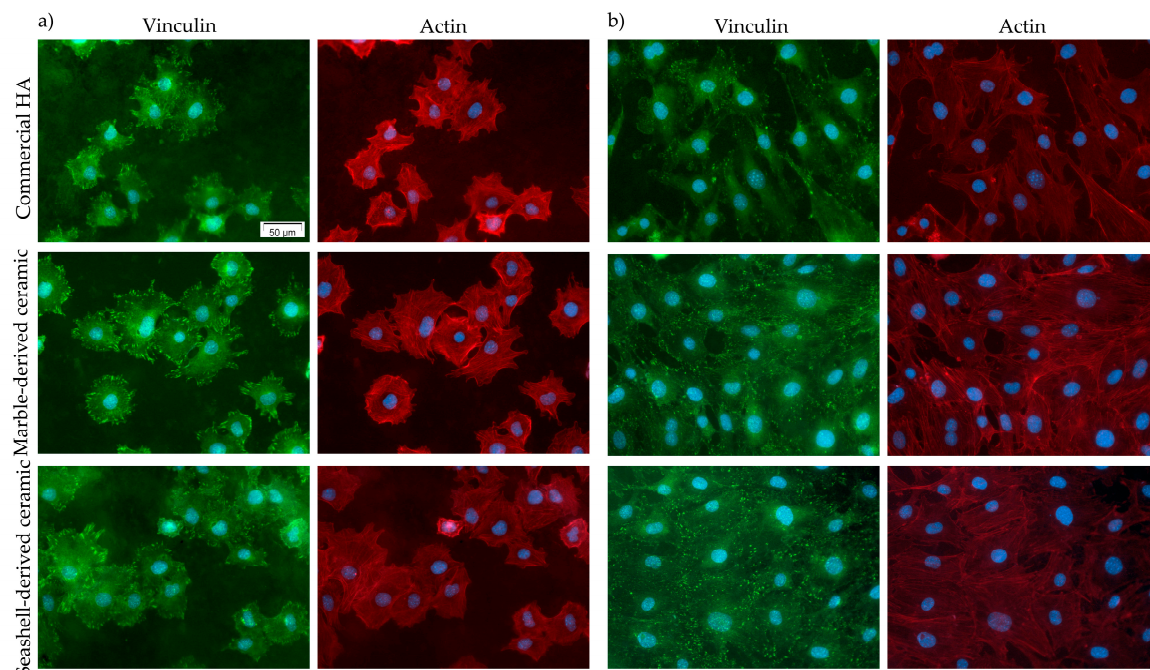

**Figure S1.** Fluorescent images of MC3T3-E1 pre-osteoblasts grown on commercial HA, marble- and seashell-derived ceramics for 3 h (a) and 24 h (b) respectively. Red fluorescence: actin cytoskeleton; Green fluorescence: vinculin signals. Scale bar: 50 μm.
